# Supplementary material for: A semi-conductive organic–inorganic hybrid emits pure white light with an ultrahigh color rendering index
Source: Royal Society of Chemistry journal article supplement (doi:10.1039/c7tc00279c), 2017-01-01
Supplement: c7tc00279c1.pdf [file c7tc00279c1.pdf]

## **A semi-conductive organic-inorganic hybrid emits pure white light with ultrahigh color rendering index**

Sasa Wang,<sup>a,b</sup> Lina Li,<sup>\*,a</sup> Zihua Sun,<sup>a</sup> Chengmin Ji,<sup>a</sup> Sijie Liu,<sup>a</sup> Zhenyue Wu,<sup>a</sup> Sangen Zhao<sup>a</sup>,  
Maochun Hong<sup>a</sup> and Junhua Luo<sup>\*,a</sup>

<sup>a</sup>*State Key Laboratory of Structural Chemistry, Fujian Institute of Research on the Structure of Matter, Chinese Academy of Sciences, Fuzhou, Fujian, 350002, P. R. China.*

<sup>b</sup>*College of Chemistry, Fuzhou University, Fuzhou 350116, China.*

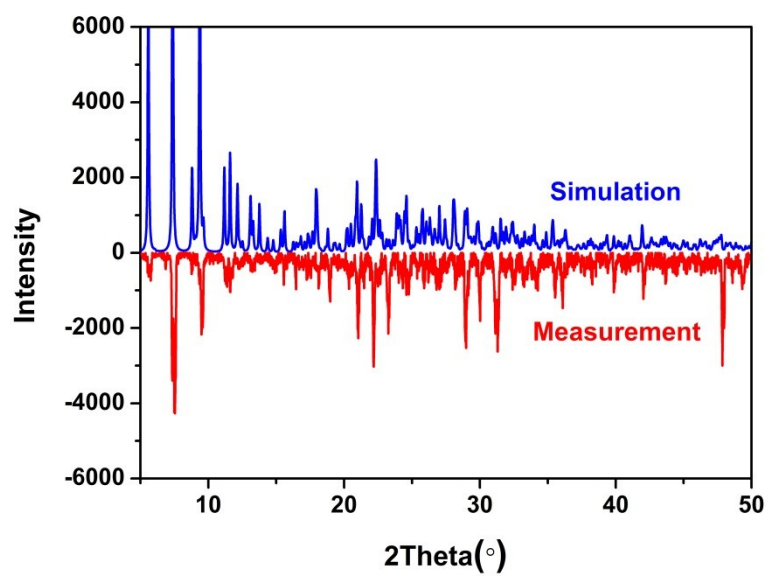

Figure S1. PXRD patterns of compound 1.

**Table S1. Crystallographic Data and Structure Refinement of 1.**

|                                                                                                     |                                                                                   |
|-----------------------------------------------------------------------------------------------------|-----------------------------------------------------------------------------------|
| Formula                                                                                             | C <sub>60</sub> H <sub>144</sub> Br <sub>18</sub> Cd <sub>3</sub> N <sub>12</sub> |
| Formula weight (g/mol)                                                                              | 2809.30                                                                           |
| Temperature (K)                                                                                     | 293                                                                               |
| Crystal system                                                                                      | triclinic                                                                         |
| Space group                                                                                         | <i>P</i> -1                                                                       |
| <i>a</i> (Å)                                                                                        | 10.6818(3)                                                                        |
| <i>b</i> (Å)                                                                                        | 15.6189(4)                                                                        |
| <i>c</i> (Å)                                                                                        | 16.5803(5)                                                                        |
| <i>α</i> (deg)                                                                                      | 75.165(3)                                                                         |
| <i>β</i> (deg)                                                                                      | 76.833(3)                                                                         |
| <i>γ</i> (deg)                                                                                      | 72.093(3)                                                                         |
| <i>V</i> (Å <sup>3</sup> )                                                                          | 2510.85(13)                                                                       |
| <i>Z</i>                                                                                            | 1                                                                                 |
| <i>D</i> <sub>calcd</sub> (g/cm <sup>3</sup> )                                                      | 1.858                                                                             |
| <i>F</i> (000)                                                                                      | 1362.0                                                                            |
| completeness (%)                                                                                    | 99.7%                                                                             |
| GOF ( <i>F</i> <sup>2</sup> )                                                                       | 1.042                                                                             |
| <i>R</i> <sub>1</sub> (on <i>F</i> <sub>o</sub> <sup>2</sup> , <i>I</i> > 2 <i>s</i> ( <i>I</i> ))  | 0.0452                                                                            |
| <i>wR</i> <sub>2</sub> (on <i>F</i> <sub>o</sub> <sup>2</sup> , <i>I</i> > 2 <i>s</i> ( <i>I</i> )) | 0.1492                                                                            |

<sup>a</sup>*R*<sub>1</sub> =  $\sum ||F_o| - |F_c|| / \sum |F_o|$ , *wR*<sub>2</sub> =  $[\sum [\omega(F_o^2 - F_c^2)^2] / \sum [\omega(F_o^2)^2]]^{1/2}$

**Table S2. Selected bond length (Å).**

| Bond        | (Å)       | Bond        | (Å)        |
|-------------|-----------|-------------|------------|
| Cd(1)–Br(1) | 2.7349(5) | Cd(2)–Br(4) | 2.5855(9)  |
| Cd(1)–Br(2) | 2.8371(8) | Cd(2)–Br(5) | 2.5675(8)  |
| Cd(1)–Br(3) | 2.7980(6) | Cd(2)–Br(6) | 2.5656(9)  |
|             |           | Cd(2)–Br(7) | 2.6063(13) |

**Table S3. The length of H-bonds of 1.**

| Bond          | (Å)   | Bond          | (Å)   |
|---------------|-------|---------------|-------|
| N1-H15A···Br2 | 2.626 | N1-H15B···Br8 | 2.517 |
| N2-H10B···Br2 | 2.665 | N1-H15C···Br8 | 2.666 |
| N2-H10C···Br5 | 2.607 | N2-H10A···Br8 | 2.494 |
| N5-H14C···Br6 | 2.481 | N5-H14B···Br9 | 2.412 |
| N6-H11A···Br7 | 2.629 | N3-H6C···Br9  | 2.511 |
| N3-H6B···Br8  | 2.521 | N4-H18C···Br9 | 2.423 |

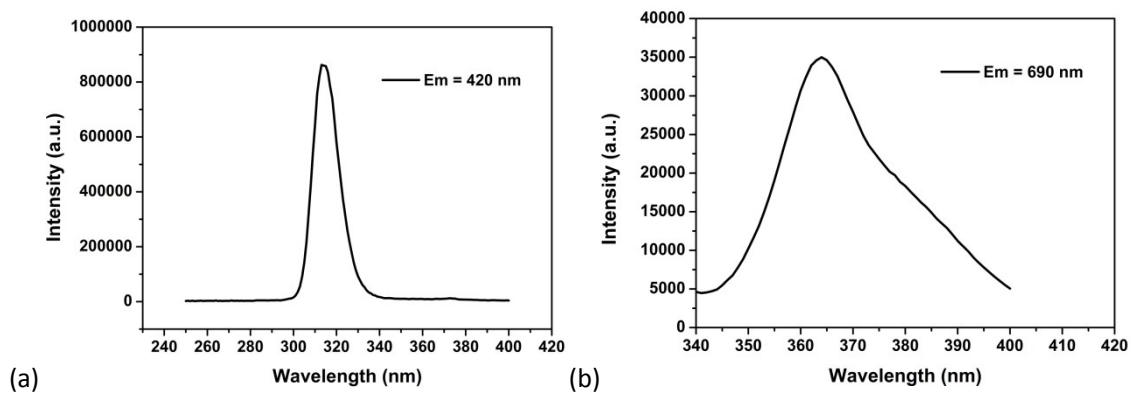

**Figure S2.** Excitation spectrum of **1** at 420 nm (a) and 690 nm (b).

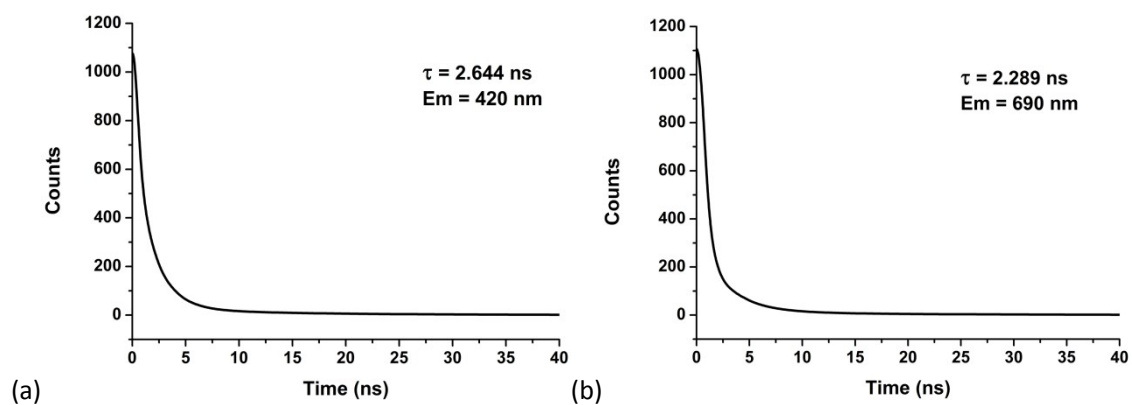

**Figure S3.** Luminescence decay data of **1** at 420 nm (a) and 690 nm (b).

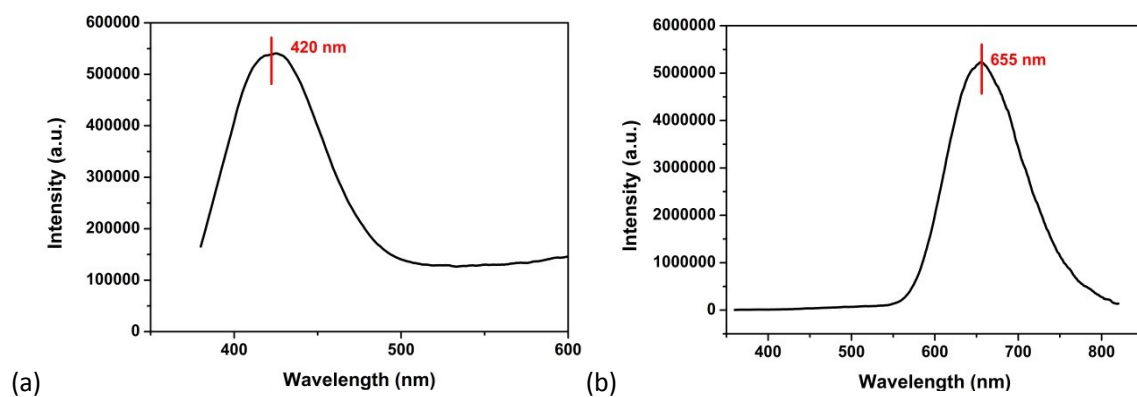

**Figure S4.** Emission spectrum of [C<sub>5</sub>H<sub>9</sub>NH<sub>3</sub>]<sup>+</sup>Br<sup>-</sup> (a) and CdBr<sub>2</sub> (b).

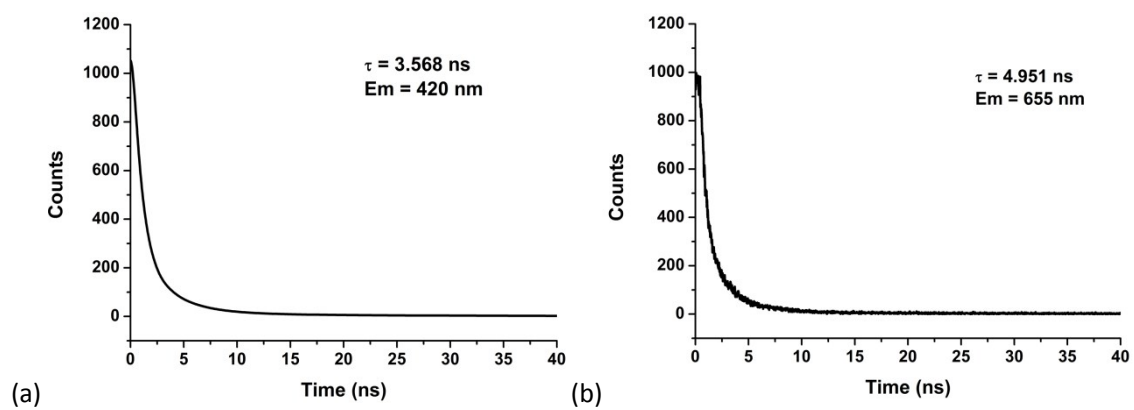

**Figure S5.** Luminescence decay data of [C<sub>5</sub>H<sub>9</sub>NH<sub>3</sub>]<sup>+</sup>Br<sup>-</sup> (a) and CdBr<sub>2</sub> (b).

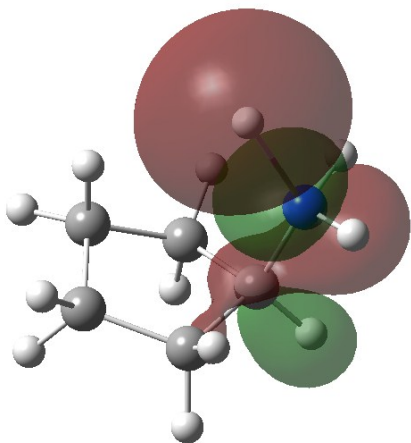

LUMO (E = -9.48 eV)  
6.55/93.45

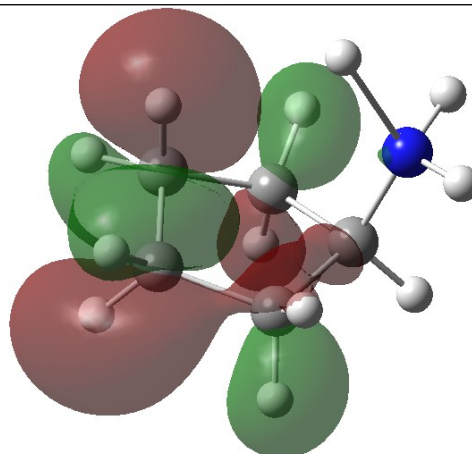

HOMO (E = -11.08 eV)  
99.55/0.45

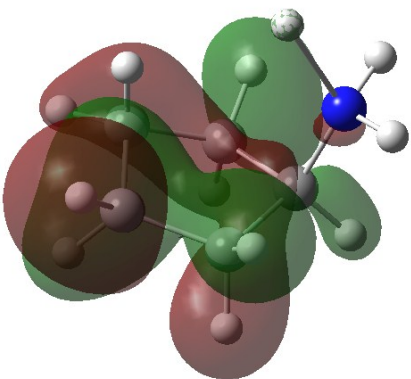

HOMO-1 (E = -13.92 eV)  
97.86/2.14

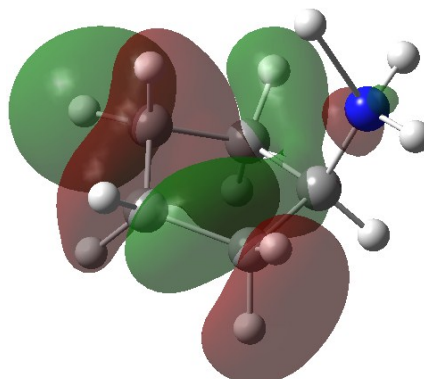

HOMO-2 (E = -14.11 eV)  
97.83/2.17

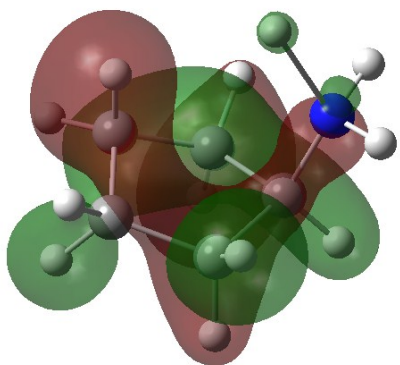

HOMO-3 (E = -14.23 eV)  
95.14/4.86

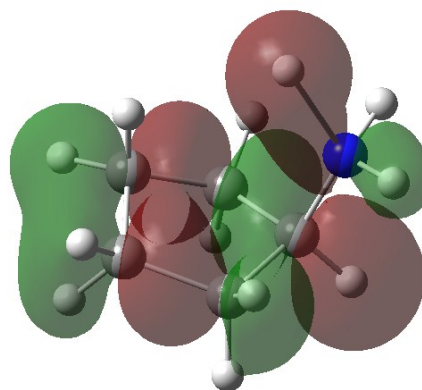

HOMO-4 (E = -14.40 eV)  
87.95/12.05

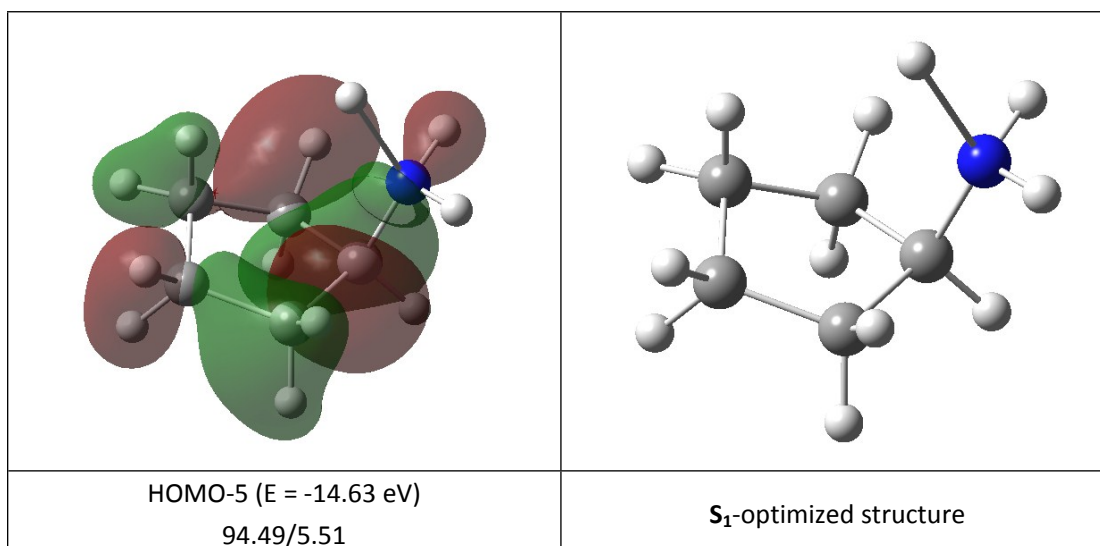

**Figure S6.** Plots of the frontier molecular orbitals involved in the emission transitions of cation part calculated by TD-DFT method at the PBE1PBE level (isovalue = 0.03) combined with the partial molecular orbital compositions (% , C5/NH<sub>3</sub>) and the optimized structure in the **S<sub>1</sub>** state.

**Table S4** The optimized geometrical coordinates (unit: angstroms) of the cation part in the lowest singlet excited state **S<sub>1</sub>** by TD-DFT method at the PBE1PBE level.

| Center number | Atomic type | Coordinates |          |          |
|---------------|-------------|-------------|----------|----------|
|               |             | X           | Y        | Z        |
| 1             | C           | 0.798076    | 0.010115 | 0.619822 |
| 2             | H           | 1.285797    | 0.02473  | 1.592079 |
| 3             | C           | -0.13478    | 1.228509 | 0.430003 |
| 4             | H           | -0.43476    | 1.63982  | 1.407998 |
| 5             | H           | 0.350168    | 2.041897 | -0.10954 |
| 6             | C           | -0.13692    | -1.20954 | 0.500312 |
| 7             | H           | 0.359544    | -2.11794 | 0.135097 |
| 8             | H           | -0.55098    | -1.48107 | 1.479739 |
| 9             | C           | -1.24334    | -0.8213  | -0.44024 |
| 10            | H           | -0.93843    | -0.66291 | -1.51597 |
| 11            | H           | -2.1403     | -1.44322 | -0.45695 |
| 12            | C           | -1.38968    | 0.770651 | -0.27896 |
| 13            | H           | -1.74839    | 1.379229 | -1.11249 |
| 14            | H           | -2.3234     | 0.594458 | 0.346089 |
| 15            | H           | 2.331253    | -0.86135 | -0.54316 |
| 16            | N           | 1.788975    | -0.0019  | -0.49441 |
| 17            | H           | 2.431433    | 0.786845 | -0.45408 |
| 18            | H           | 1.49508     | 0.242223 | -2.29363 |

**Table S5.** The emission transitions for the cation part in the solid state by TD-DFT method at the PBE1PBE level.

| States | $E$ , nm<br>(eV) | O.S.   | Transition (contri.)                   | Assignment         |
|--------|------------------|--------|----------------------------------------|--------------------|
| $S_1$  | 364              | 0.0033 | HOMO-1→LUMO (96%)                      |                    |
| $S_2$  | 348              | 0.0005 | HOMO-2→LUMO (97%)                      |                    |
| $S_3$  | 343              | 0.0003 | HOMO-3→LUMO (87%)<br>HOMO-4→LUMO (10%) | C5→NH <sub>3</sub> |
| $S_4$  | 317              | 0.0030 | HOMO-5→LUMO (81%)<br>HOMO-4→LUMO (11%) |                    |

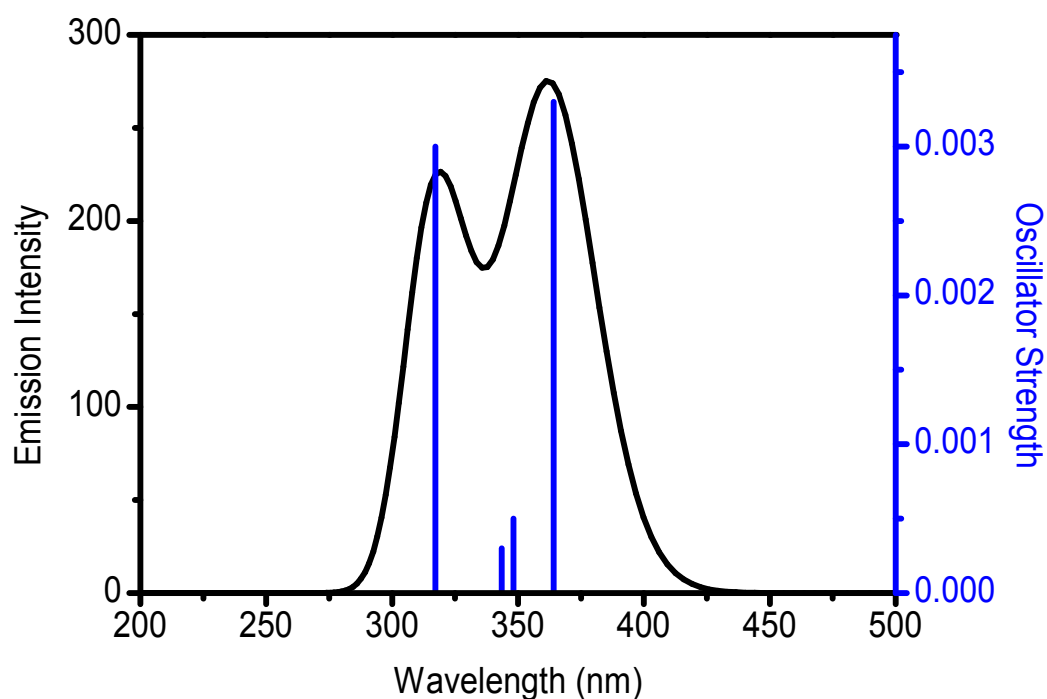

**Figure S7.** The calculated (blue vertical bars) and simulated (black line, implemented by GaussSum) emission spectra of the cation part at ambient temperature calculated by TD-DFT method at the PBE1PBE level.



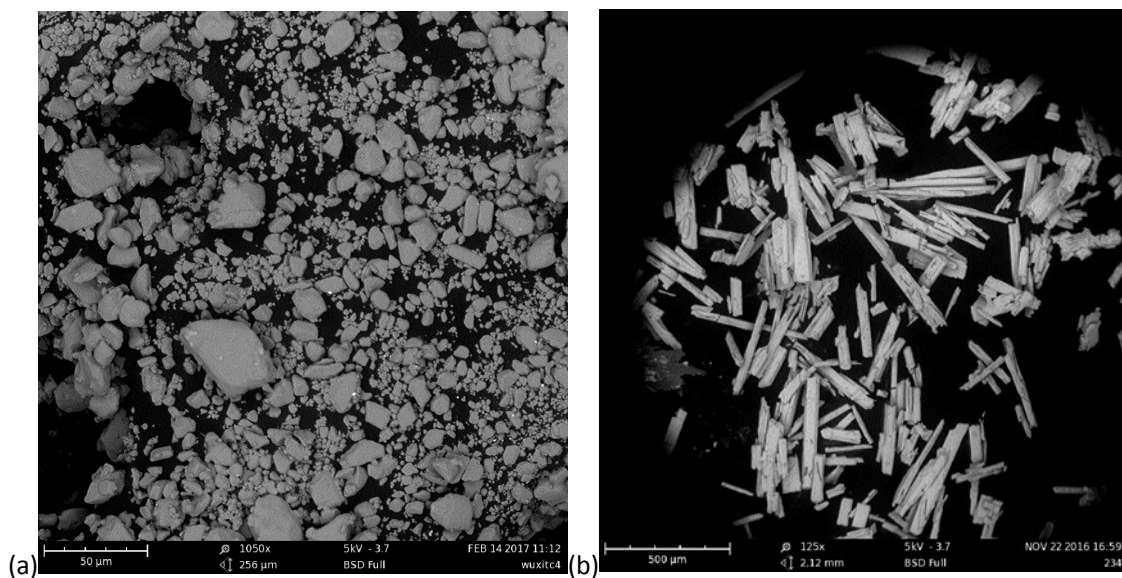

Figure S8. SEM images of (a) hand grinded powders and (b) crystals.

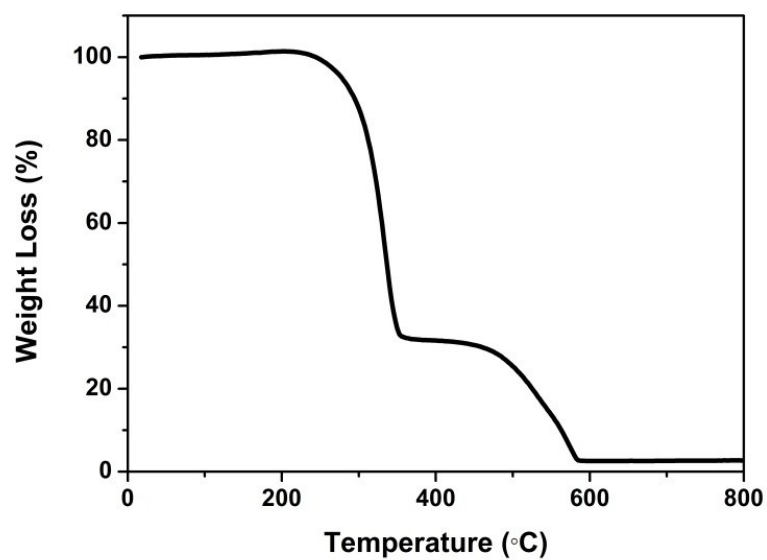

Figure S9. TG curve of compound 1.

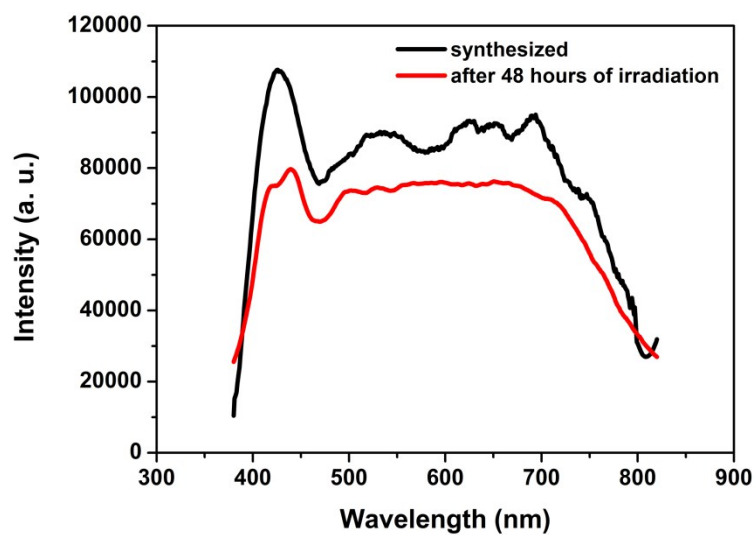

**Figure S10.** Photoluminescence spectrum of **1** before and after irradiated for 48 hours.

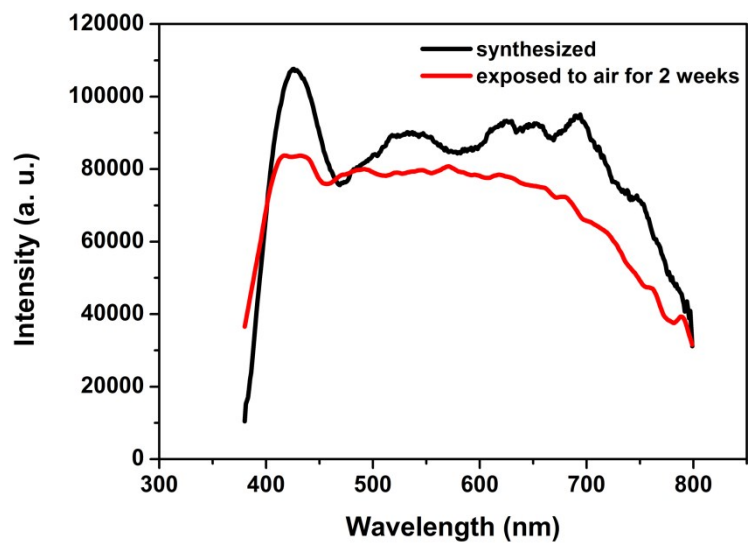

**Figure S11.** Photoluminescence spectrum of **1** before and after exposed to ambient conditions for two weeks.

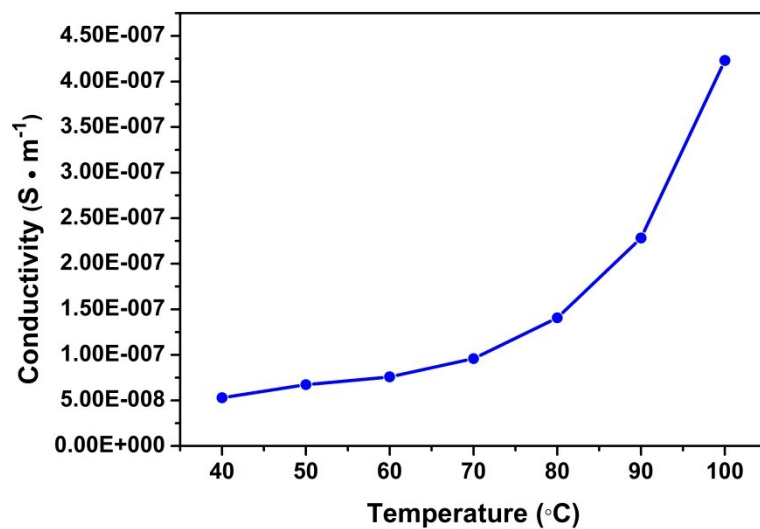

Figure S12. Temperature-dependent conductivity of **1**.
